# Supplementary material for: Dormancy-like Phenotype of Aggregatibacter actinomycetemcomitans: Survival during Famine
Source: MDPI journal article supplement (doi:10.3390/pathogens13050418), 2024-05-16
Supplement: s1 [file s1]

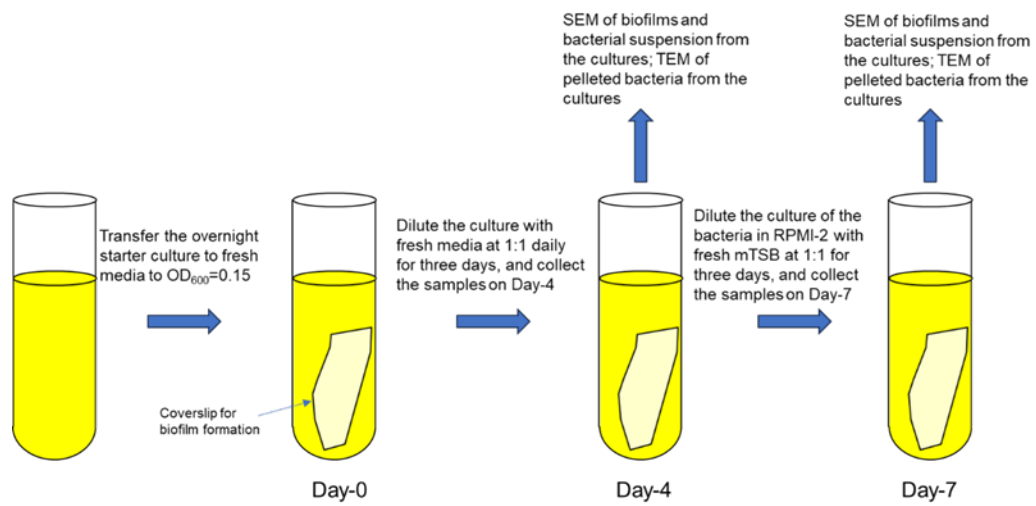

**Supplementary Figure S1.** Summary of protocols used to prepare *A. actinomycetemcomitans* samples for electron microscopy.
